# Supplementary material for: Self-assembly of columnar mesophases from diaminotriazines
Source: Royal Society of Chemistry journal article supplement (doi:10.1039/b610666h), 2006-01-01
Supplement: b610666h.pdf [file b610666h.pdf]

# Supporting Information

## Self-Assembly of Columnar Mesophases from Diaminotriazines

Kenneth E. Maly<sup>a\*</sup>, Caroline Dauphin, and James D. Wuest

*Département de Chimie, Université de Montréal  
Montréal, Québec H3C 3J7 Canada*

*<sup>a</sup>Current Address:  
Department of Chemistry, Wilfrid Laurier University  
Waterloo, Ontario N2L 3C5, Canada*

### Contents

- I.** Differential Scanning Calorimetry (DSC) Traces for Compounds **2a-d** and **3** (S2-S6).
- II.** X-Ray Powder Diffractograms for Compounds **2c** and **2d** at 132 °C (S7-S8).
- III.** Calculation of Lattice Parameters and Estimation of Densities (S9).

\*Author to whom correspondence may be addressed: [kmaly@wlu.ca](mailto:kmaly@wlu.ca)

Sample: KM-V-227  
Size: 0.9610 mg  
Method: ken

DSC

File: C:\...\DSC\Mars 2006\Ken\KM-V-227.001  
Operator: ED  
Run Date: 03-Mar-06 15:17  
Instrument: DSC Q1000 V7.3 Build 249

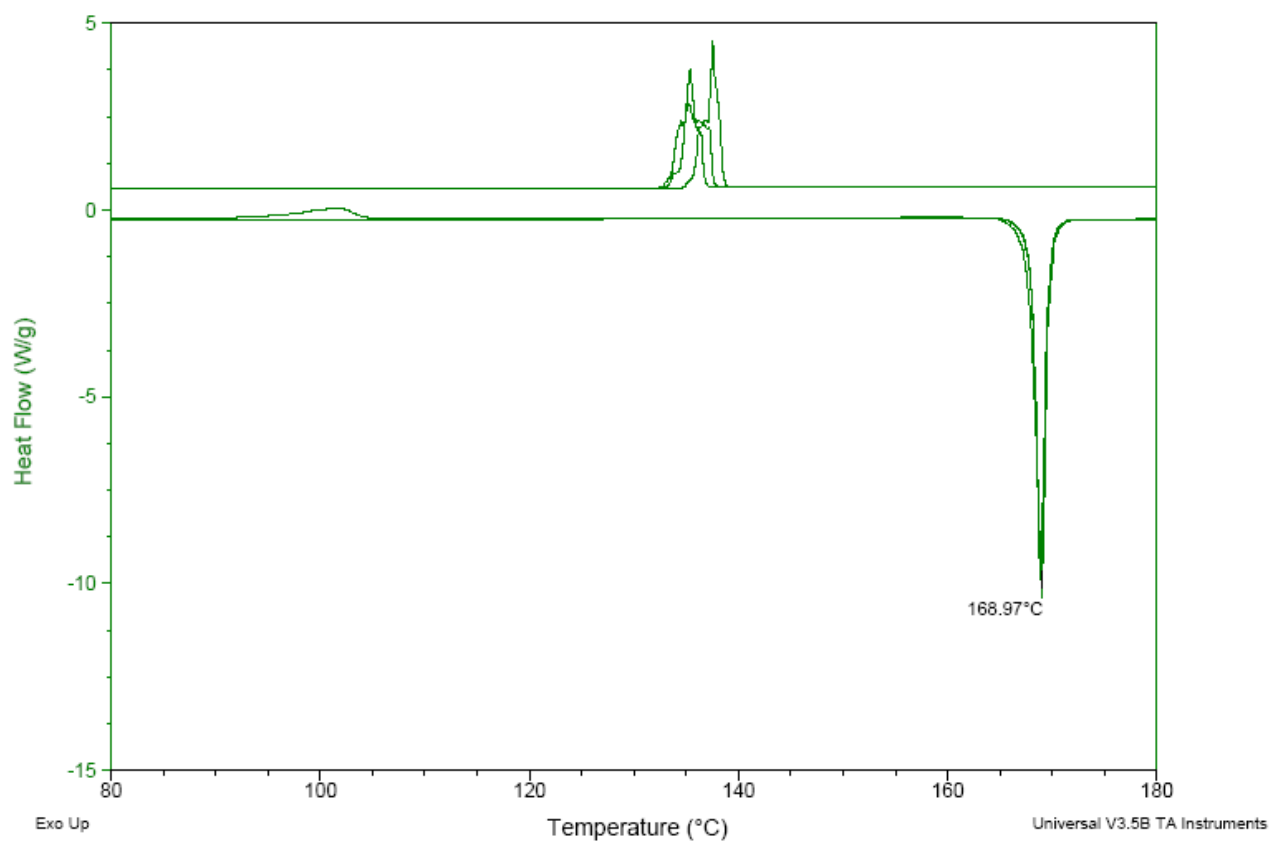

**Figure S1.** DSC Trace for compound **2a** over three heating and cooling cycles.

Sample: KM-V-60  
Size: 1.7760 mg  
Method: Ken

DSC

File: C:\TA\Data\DSC\out\Ken\KM-V-60.001  
Operator: ED  
Run Date: 22-Sep-05 10:47  
Instrument: DSC Q1000 V7.3 Build 249

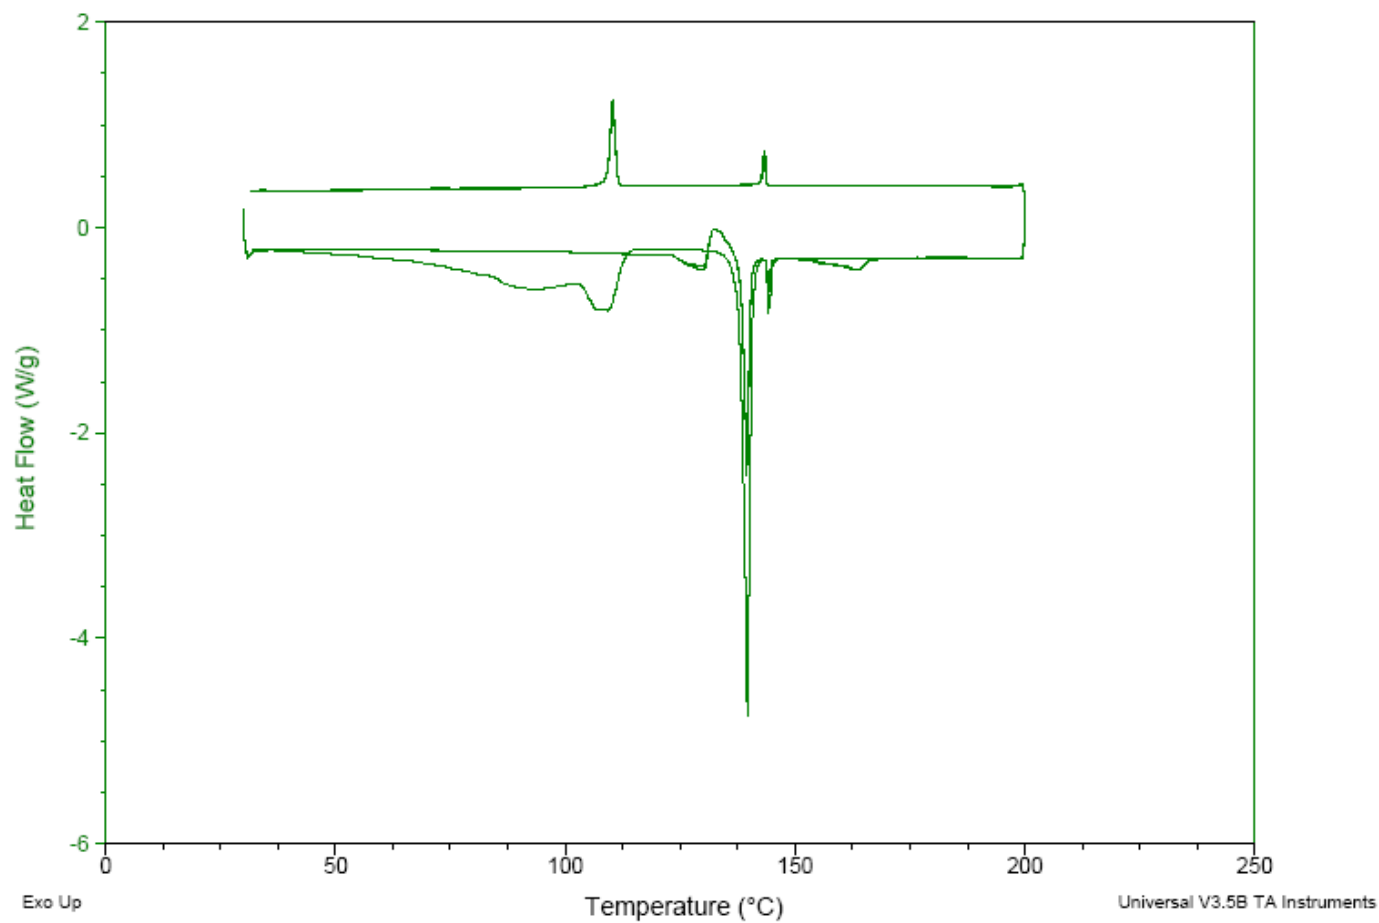

**Figure S2.** DSC Trace for compound **2b** over three heating and cooling cycles.

Sample: KM-V-132  
Size: 1.7320 mg  
Method: Ken

DSC

File: C:\DSC\2006\Jan 2006\Ken\KM-V-132.001  
Operator: ED  
Run Date: 05-Jan-06 10:17  
Instrument: DSC Q1000 V7.3 Build 249

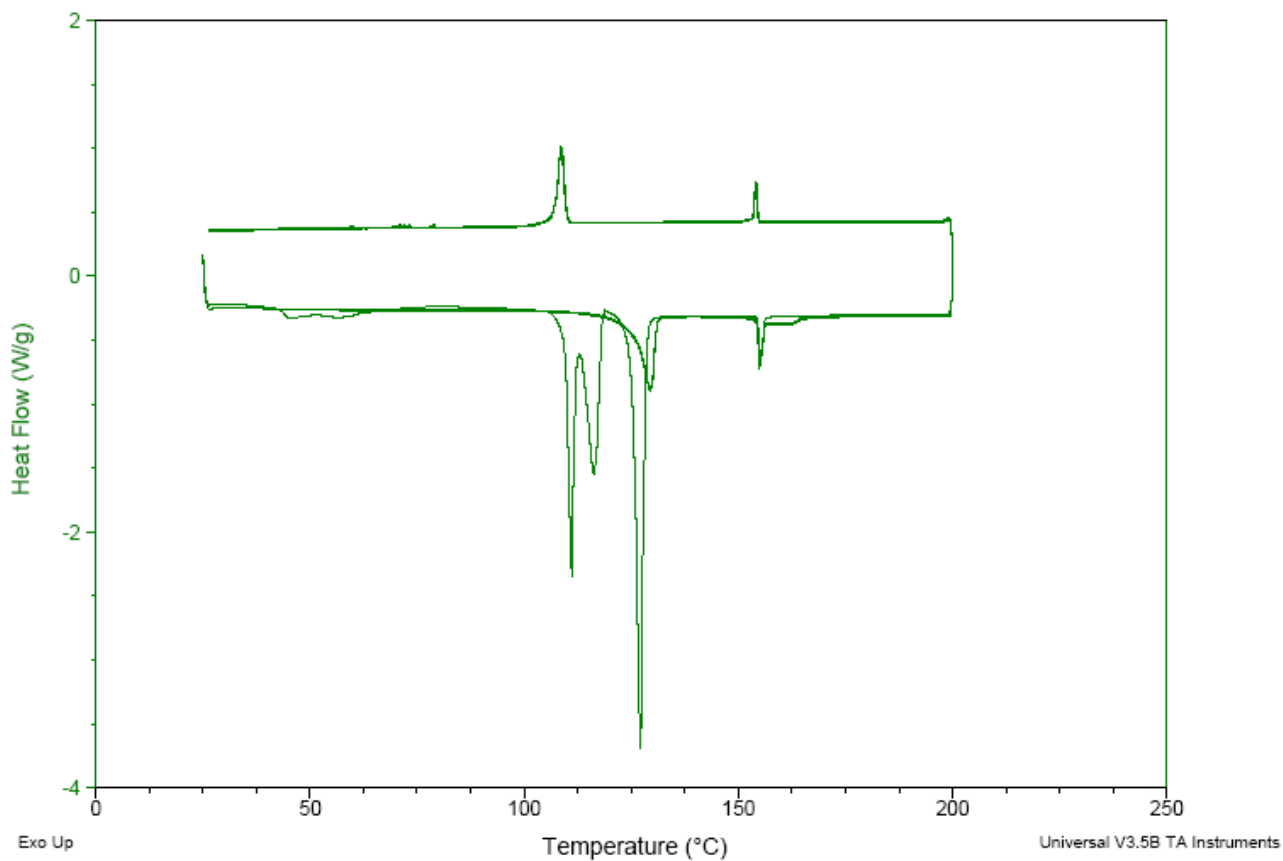

**Figure S3.** DSC Trace for compound **2c** over three heating and cooling cycles.

Sample: KM-V-242  
Size: 1.2030 mg  
Method: Ken

DSC

File: C:\2006\Mars 2006\Ken\KM-V-242.001  
Operator: ED  
Run Date: 22-Mar-06 01:57  
Instrument: DSC Q1000 V7.3 Build 249

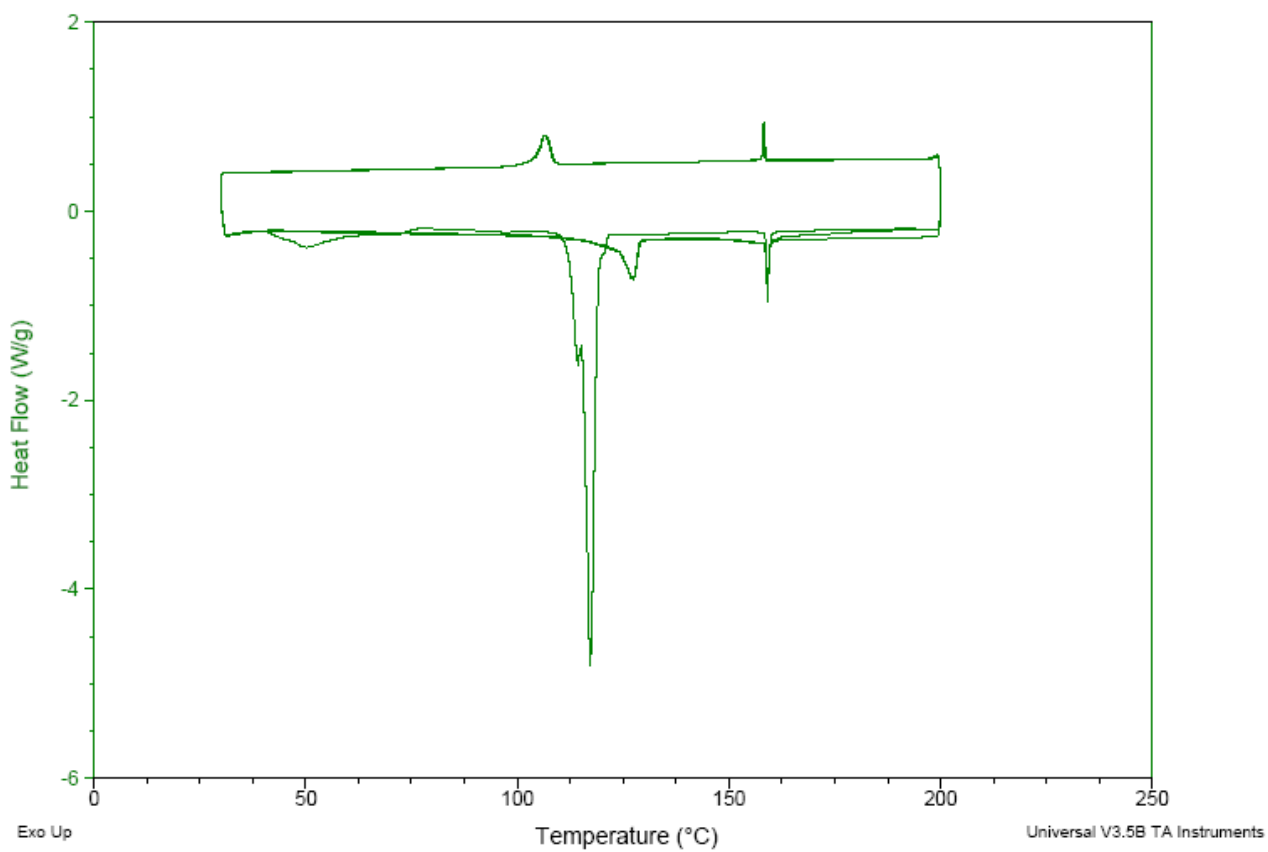

**Figure S4.** DSC Trace for compound **2d** over three heating and cooling cycles.

Sample: KM-V-192  
Size: 0.9630 mg  
Method: Ken

DSC

File: C:\...2006\Mars 2006\Ken\KM-V-192.003  
Operator: ED  
Run Date: 21-Mar-06 18:54  
Instrument: DSC Q1000 V7.3 Build 249

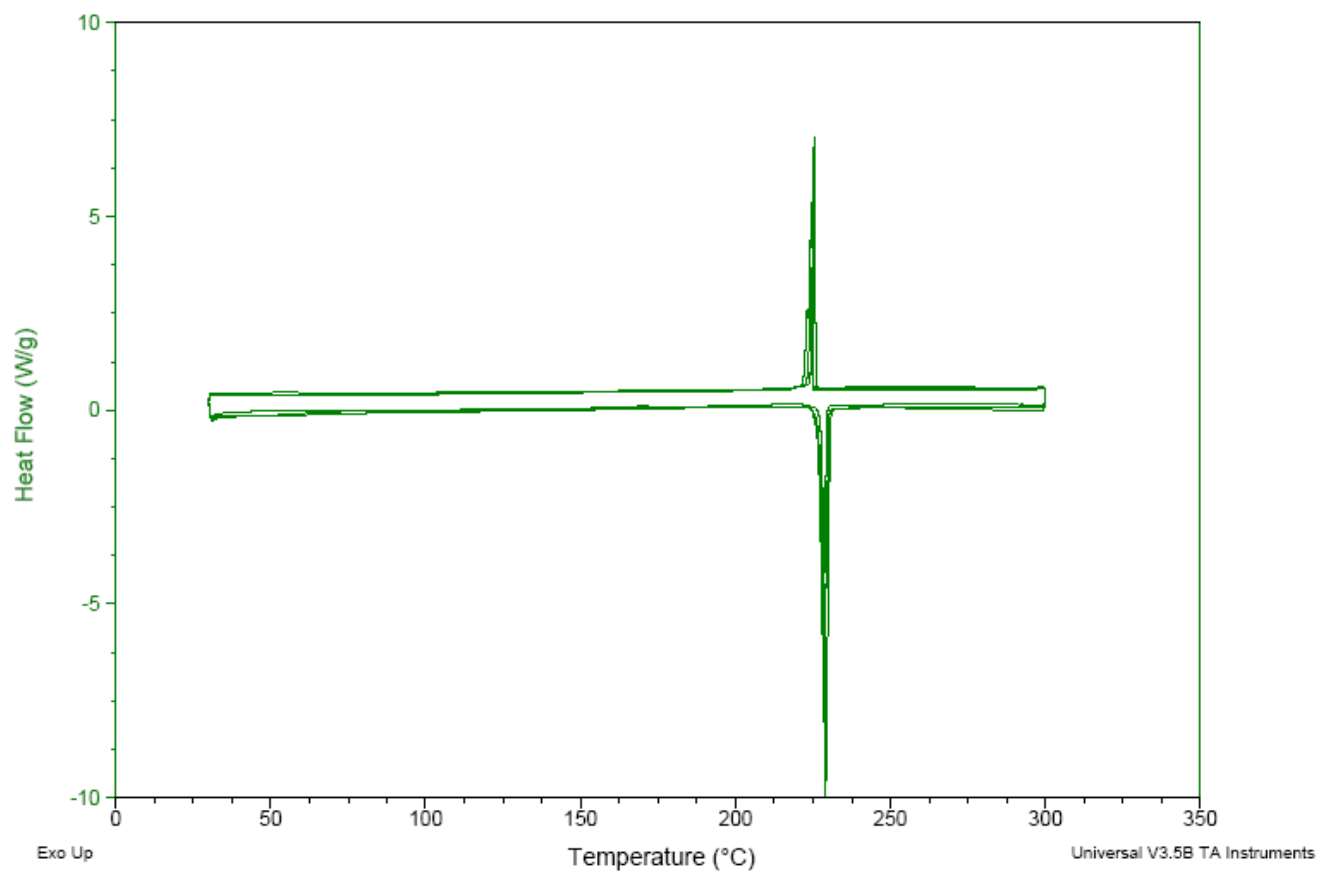

**Figure S5.** DSC Trace for compound **3** over three heating and cooling cycles.

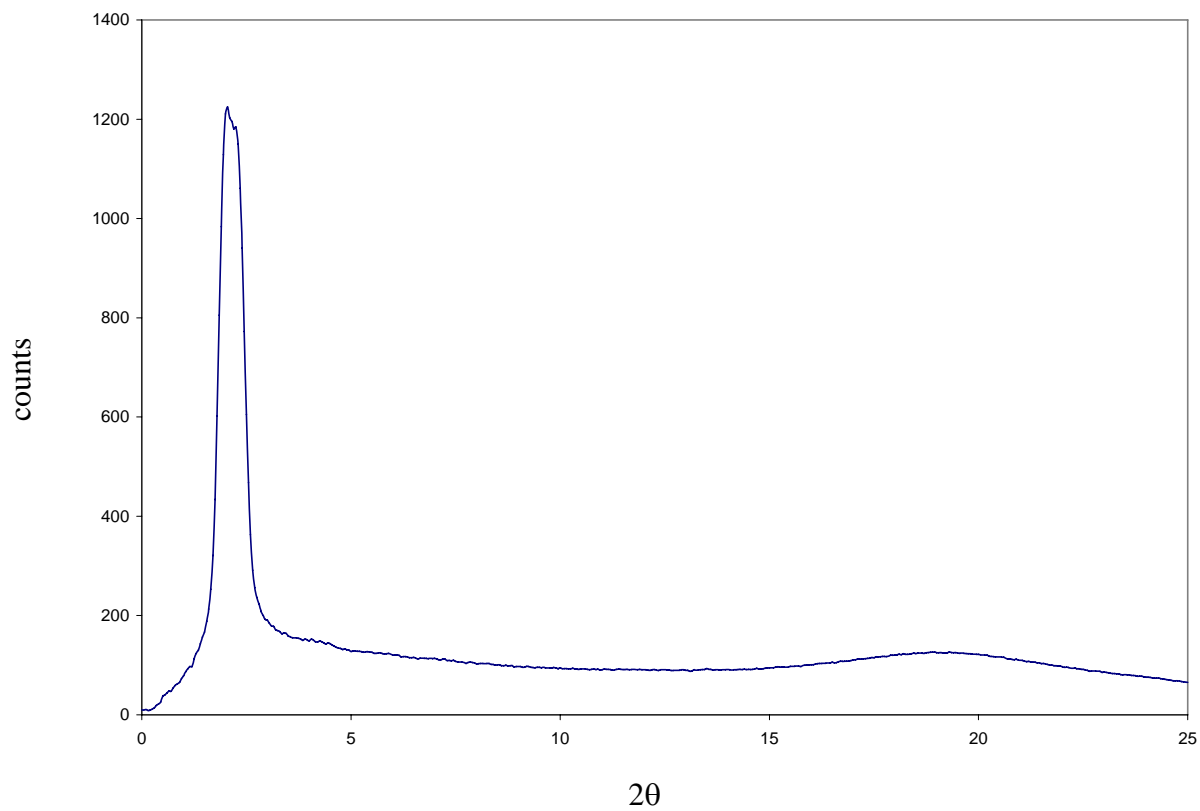

**Figure S6.** X-Ray diffractogram for compound **2c** at 132 °C.

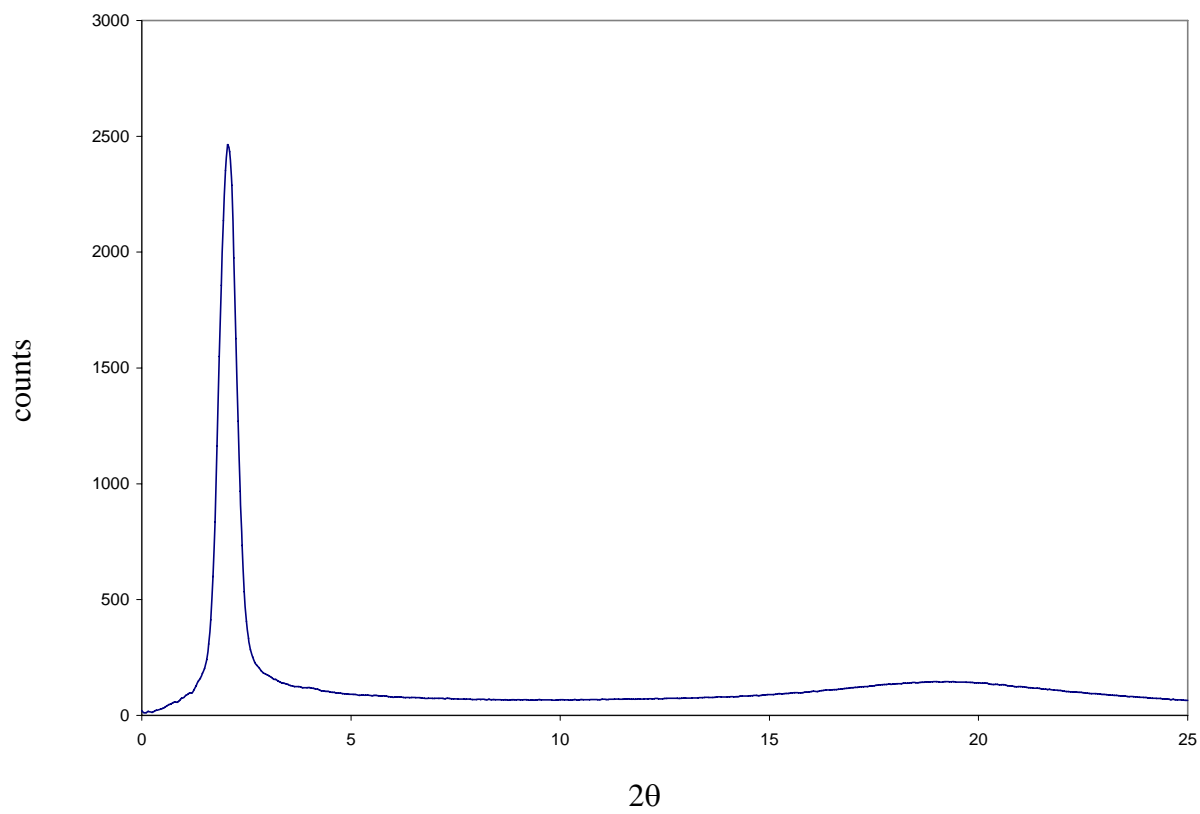

**Figure S7.** X-Ray diffractogram for compound **2d** at 132 °C.



### Calculation of Lattice Parameters and Estimation of Density

The lattice parameters ( $a$ ) for compounds **2b-d** were calculated from the observed (100) reflections using the following equation:  $a = 2(d_{100})/\sqrt{3}$ . The unit cell volume was calculated using the following equation:  $V = (\sqrt{3}/2)a^2c \times 10^{-24}$ , where  $V$  is the unit cell volume in  $\text{cm}^3$ , and  $a$  and  $c$  are the lattice parameters in Angstroms. The value of  $c$  was assumed to be  $3.7 \text{ \AA}$ , which is a reasonable estimate for the distance between molecules in a columnar stack and corresponds to values observed for similar compounds.<sup>1</sup> The mass of each unit cell was calculated assuming six molecules per unit cell.

**Table S1.** Observed spacings from X-Ray measurements, and the corresponding lattice parameters and calculated densities.

| Compound  | R =                          | Observed Spacing (1 0 0)<br>Reflections ( $\text{\AA}$ ) | Lattice<br>Parameters ( $\text{\AA}$ ) | Calculated density<br>( $\text{g/cm}^3$ ) |
|-----------|------------------------------|----------------------------------------------------------|----------------------------------------|-------------------------------------------|
| <b>2b</b> | $\text{C}_8\text{H}_{17}$    | $d_{100} = 39.1$                                         | $a = 45.1$                             | 0.80                                      |
| <b>2c</b> | $\text{C}_{10}\text{H}_{21}$ | $d_{100} = 41.1$                                         | $a = 47.4$                             | 0.80                                      |
| <b>2d</b> | $\text{C}_{12}\text{H}_{25}$ | $d_{100} = 42.9$                                         | $a = 49.5$                             | 0.80                                      |

1. J. Barberá, L. Puig, P. Romero, J. L. Serrano, T. Sierra, *J. Am. Chem. Soc.* 2005, **127**, 458-464.
